# Supplementary material
Source: PubMed Central journal article supplement (PMC5526607)
Supplement: NIHMS870866-supplement-Table_S1.pdf [file NIHMS870866-supplement-Table_S1.pdf]

**Cell, Volume 168**

## **Supplemental Information**

### **Decoupling the Functional Pleiotropy of Stem Cell Factor by Tuning c-Kit Signaling**

**Chia Chi M. Ho, Akanksha Chhabra, Philipp Starkl, Peter-John Schnorr, Stephan Wilmes, Ignacio Moraga, Hye-Sook Kwon, Nicolas Gaudenzio, Riccardo Sibilano, Tom S. Wehrman, Milica Gakovic, Jonathan T. Sockolosky, Matthew R. Tiffany, Aaron M. Ring, Jacob Piehler, Irving L. Weissman, Stephen J. Galli, Judith A. Shizuru, and K. Christopher Garcia**

**Table S1. Related to Figure 3.** List of molecules examined in Primity Bio Pathway

| #  | Phospho-Antibody Specificity    | #   | Phospho-Antibody Specificity      | #   | Phospho-Antibody Specificity   |
|----|---------------------------------|-----|-----------------------------------|-----|--------------------------------|
| 1  | 4ebp1 t37                       | 51  | IRS1 y896                         | 101 | SMAD2 s465/467 SMAD3 s423/s425 |
| 2  | 53BP1 s1778                     | 52  | JNK (pT183/pY185)                 | 102 | SRC y418                       |
| 3  | AML1 pSer249                    | 53  | JUN s63                           | 103 | STAT1 s727                     |
| 4  | AMPK s182                       | 54  | JUN s73                           | 104 | STAT1 y701                     |
| 5  | Anti-TBK1 (pS172)               | 55  | LAT y171                          | 105 | STAT3 s727                     |
| 6  | ATF2 t71                        | 56  | LAT y226                          | 106 | STAT3 y705                     |
| 7  | ATM s1981                       | 57  | LCK Y505                          | 107 | STAT4 Y693                     |
| 8  | AUR At288/Bt232/Ct198           | 58  | MAP2K1 s222 MAP2K2                | 108 | STAT5 y694                     |
| 9  | BAD s112                        | 59  | MAP2K1 s298                       | 109 | STAT6 Y641                     |
| 10 | BCAR1 Y249                      | 60  | MAP2K4 s257                       | 110 | SYK s525/s526                  |
| 11 | BCL2 s70                        | 61  | MAPK3 t202/y204 MAPK1             | 111 | TBK1 s172                      |
| 12 | Bcr pTyr177                     | 62  | MAPKAPK2 t334                     | 112 | TP53 ack382                    |
| 13 | BLNK y84                        | 63  | MARCKS s167                       | 113 | TP53 s37                       |
| 14 | Btk (pY223)/Itk (pY180)         | 64  | M-CSF pTyr723                     | 114 | Tuberin/TSC2 pSer939           |
| 15 | BTK y551 ITK y511               | 65  | MEK1 t286                         | 115 | WIPF1 s488                     |
| 16 | CASP3 Cleaved                   | 66  | MEK1,2 pSer221                    | 116 | ZAP70 (PY319)/Syk (PY352)      |
| 17 | CBL y700                        | 67  | MKI67 Total                       | 117 | Zap-70 pTyr315+319             |
| 18 | CBL Y774                        | 68  | MNK t197/202                      | 118 | ZAP70 y292                     |
| 19 | CCNE1 t62                       | 69  | mTOR (pS2448)                     |     |                                |
| 20 | CD247 y142                      | 70  | MYC Total                         |     |                                |
| 21 | Cdc2 y15                        | 71  | NDRG1 t346                        |     |                                |
| 22 | CDKN1A Total                    | 72  | NFKB ser536                       |     |                                |
| 23 | CDKN1B Total                    | 73  | NFKB1A Total                      |     |                                |
| 24 | CEBPB t235/t188                 | 74  | NRF2                              |     |                                |
| 25 | CHK1 s345                       | 75  | p38 t180/y182                     |     |                                |
| 26 | Chk2 (Thr68)                    | 76  | p53 pSer46                        |     |                                |
| 27 | CHUK s176/s180 IKBKB s176/s180B | 77  | p70 s6 pThr421+pSer4              |     |                                |
| 28 | Cleaved PARP (Asp 214)          | 78  | PLCG1 y783                        |     |                                |
| 29 | CREB1 s133 ATF1 s63             | 79  | PLCG2 y759                        |     |                                |
| 30 | CrkL pTyr207                    | 80  | PLK1 t210                         |     |                                |
| 31 | CRKL y207                       | 81  | P-p44/42 MAPK (T202/Y204) (197G2) |     |                                |
| 32 | CTNND1 s268                     | 82  | PRKACB s114                       |     |                                |
| 33 | EIF4E s209                      | 83  | PRKCA t497                        |     |                                |
| 34 | EIF4EBP1 t36/t45                | 84  | PTEN                              |     |                                |
| 35 | EIF4EBP1 t69                    | 85  | PTK2B y402                        |     |                                |
| 36 | ELK1 s383                       | 86  | PTPN11 y542                       |     |                                |
| 37 | EZR Y353                        | 87  | PZR (Y241)                        |     |                                |
| 38 | FAK s910                        | 88  | RB s807/s811                      |     |                                |
| 39 | FOS s32                         | 89  | RB1 s780                          |     |                                |
| 40 | FOXO3A s253                     | 90  | RELA s529                         |     |                                |
| 41 | GSK3B s9                        | 91  | RELB s552                         |     |                                |
| 42 | H2AFX s139                      | 92  | RPS6 s235/236                     |     |                                |
| 43 | Histone H3 s10                  | 93  | RPS6 s240                         |     |                                |
| 44 | Histone H3 s28                  | 94  | RPS6 s244                         |     |                                |
| 45 | Histone H3 t11                  | 95  | RPS6KA1 s380                      |     |                                |
| 46 | HS1 y397                        | 96  | SHIP2 (Tyr1135)                   |     |                                |
| 47 | HSP27 s78                       | 97  | SHP-2 (y580)                      |     |                                |
| 48 | HSP27-s15                       | 98  | SirT1 pSer47                      |     |                                |
| 49 | HSPB1 s82                       | 99  | SLP-76 (s376)                     |     |                                |
| 50 | IRF7 s479                       | 100 | SLP76 y128                        |     |                                |
