# Supplementary material
Source: PubMed Central journal article supplement (PMC5526607)

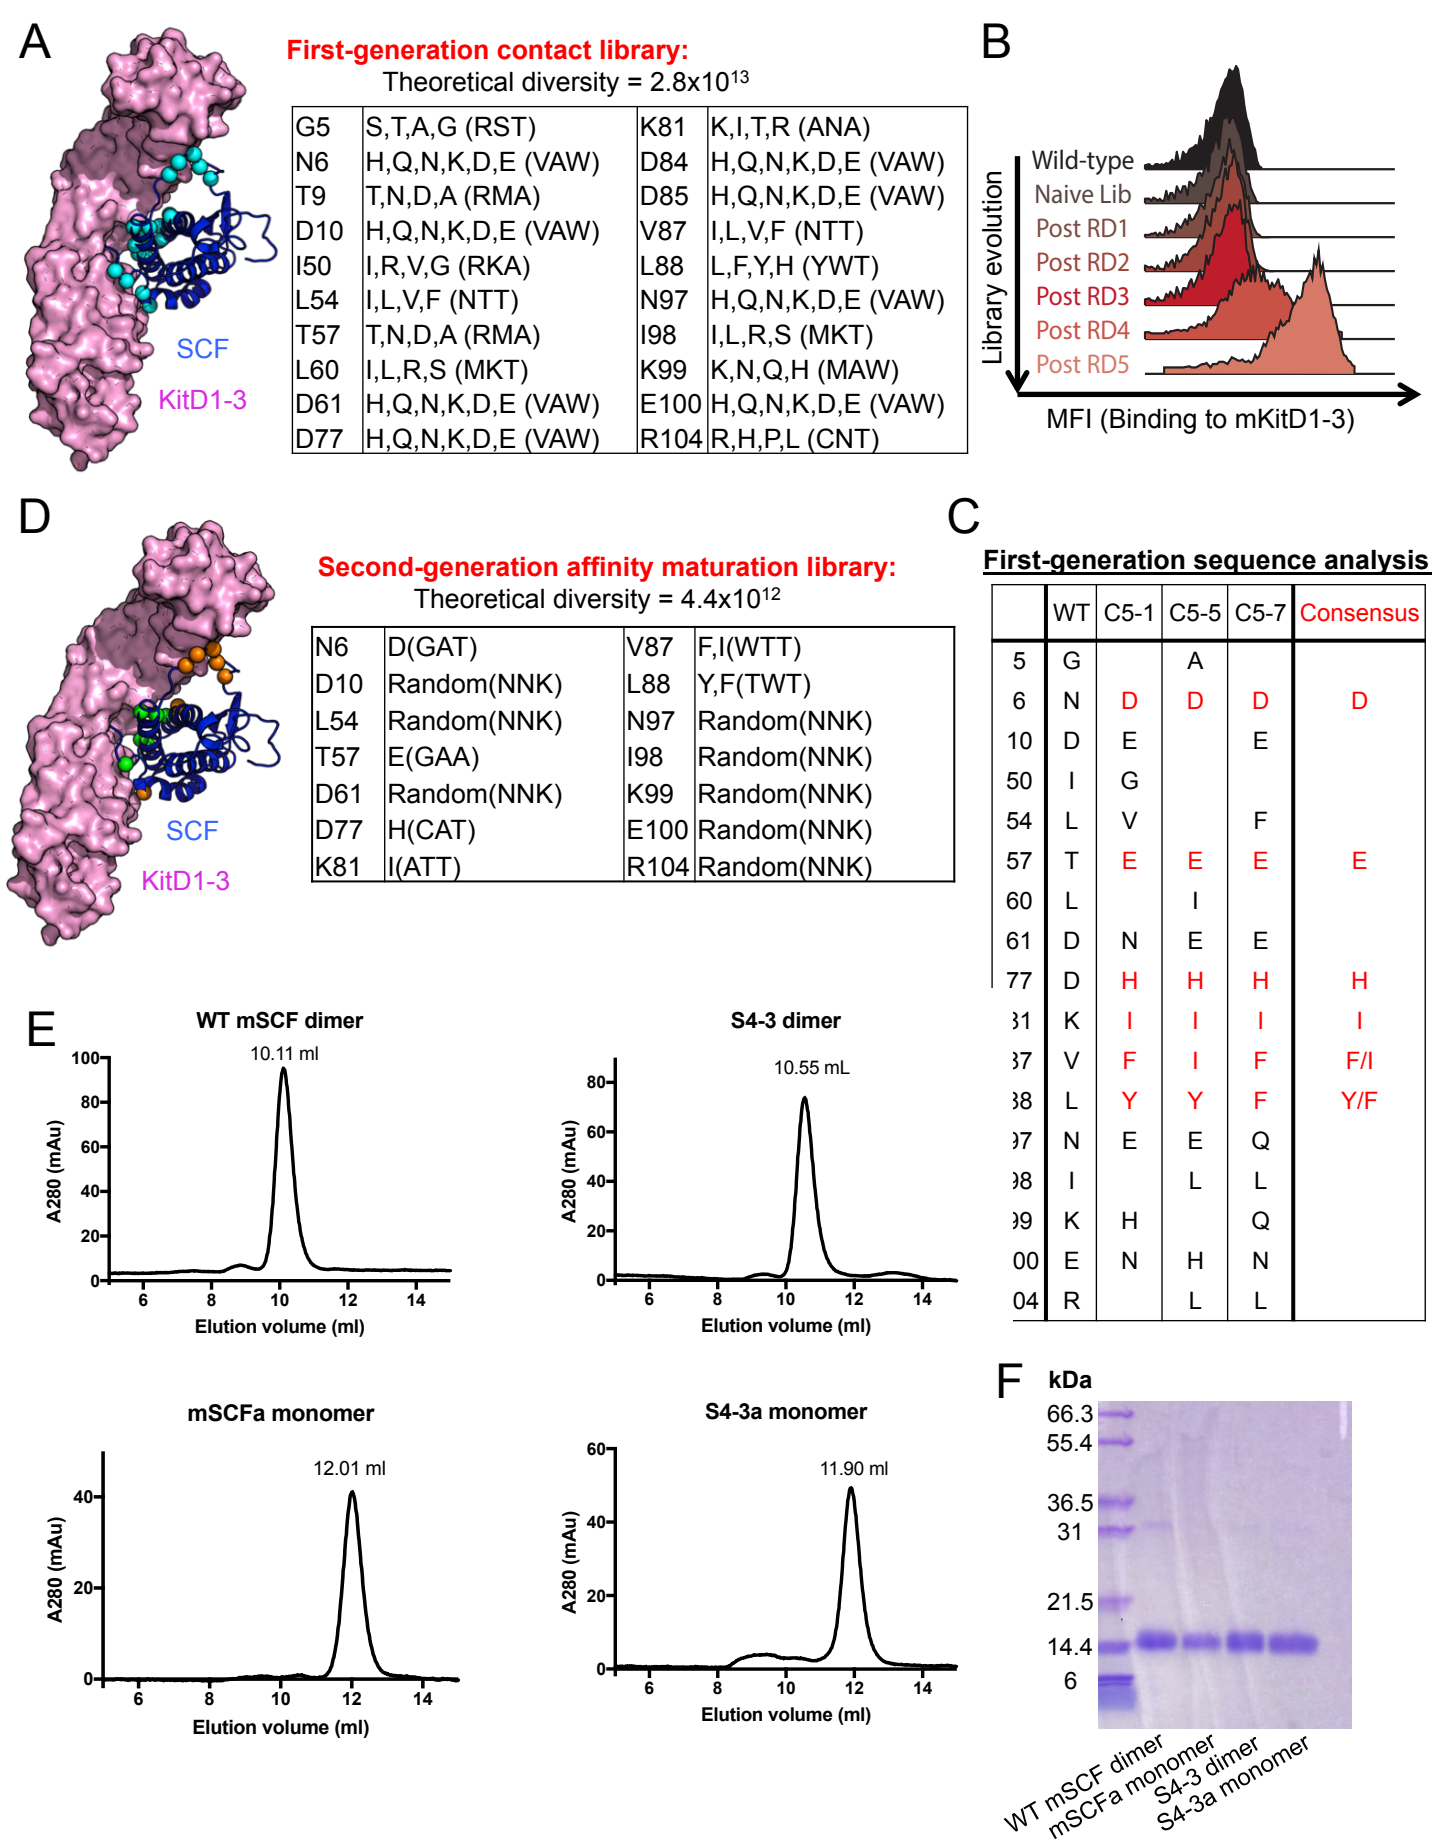

Figure S1

Supplement: NIHMS870866-supplement-Figure_S1.pdf [file NIHMS870866-supplement-Figure_S1.pdf]

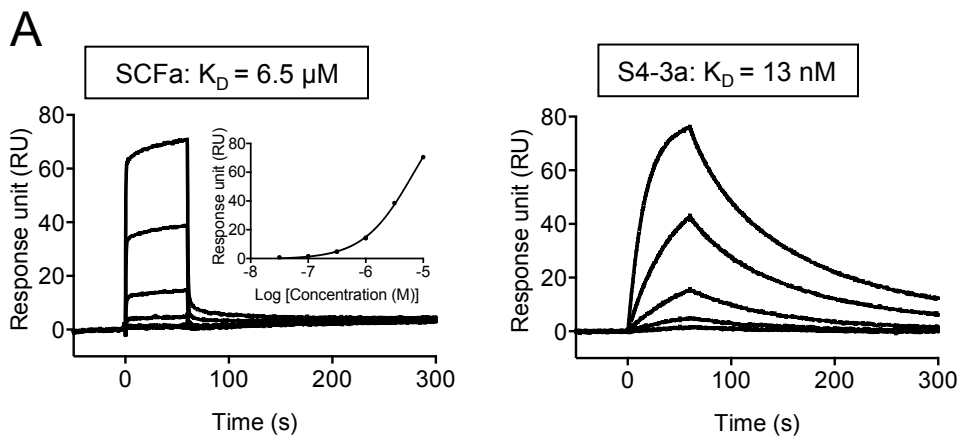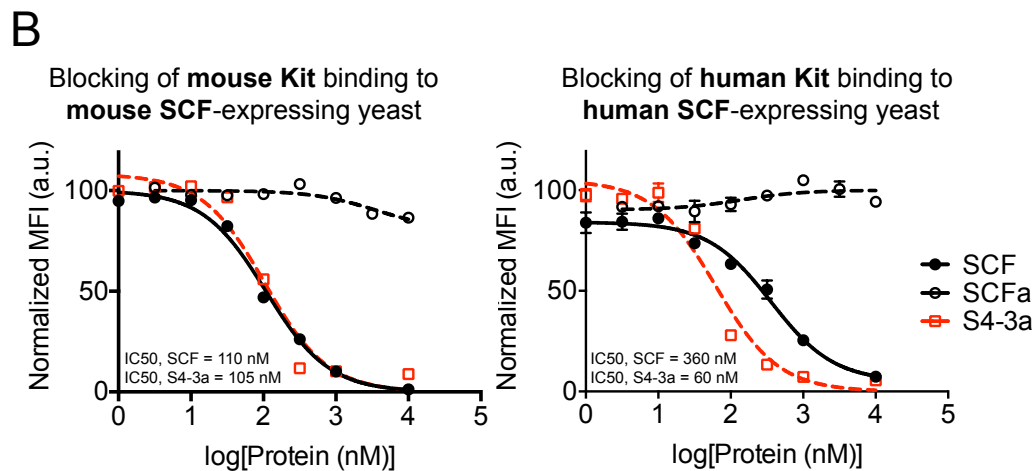

Supplement: NIHMS870866-supplement-Figure_S2.pdf [file NIHMS870866-supplement-Figure_S2.pdf]

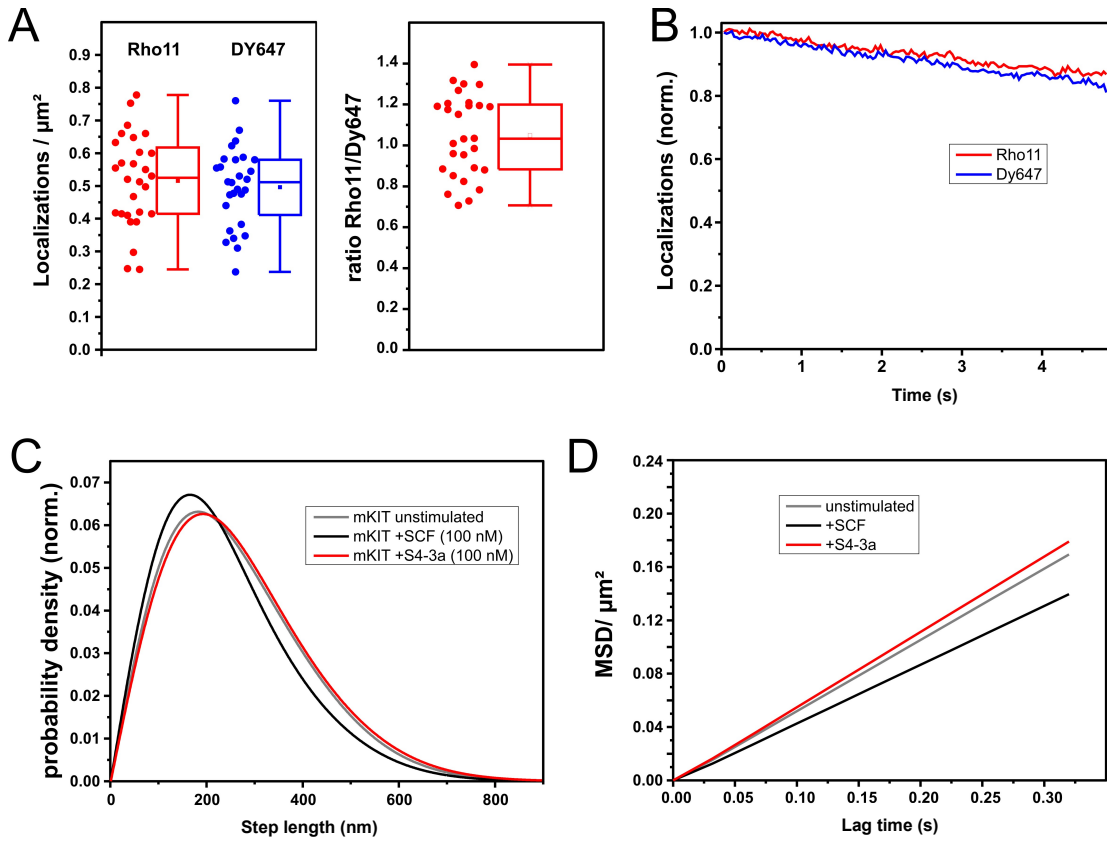

Figure S3

Supplement: NIHMS870866-supplement-Figure_S3.pdf [file NIHMS870866-supplement-Figure_S3.pdf]

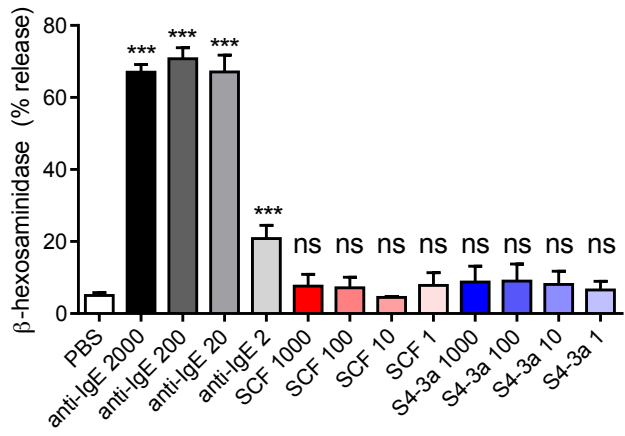

Figure S4

Supplement: NIHMS870866-supplement-Figure_S4.pdf [file NIHMS870866-supplement-Figure_S4.pdf]

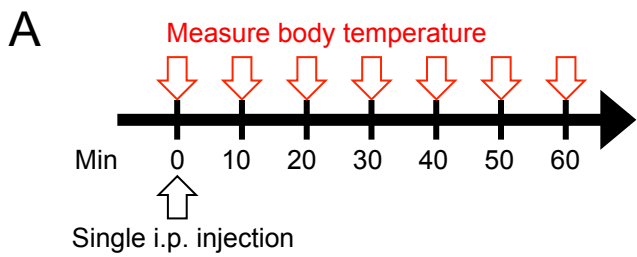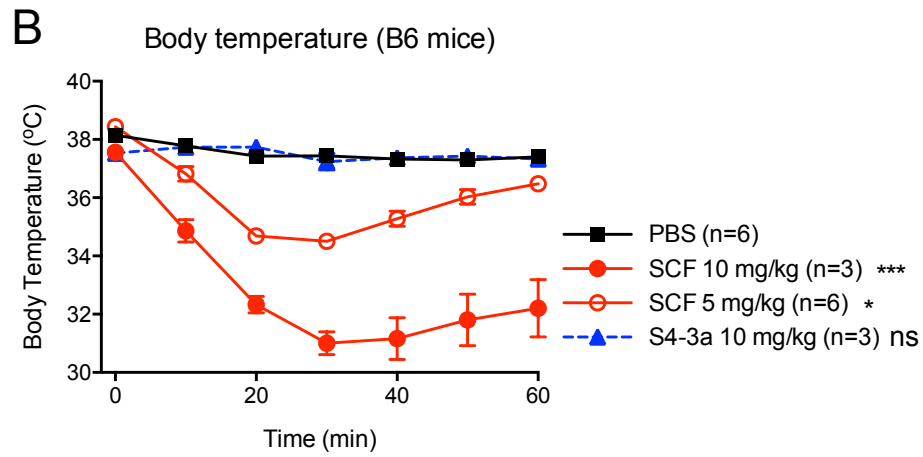

Supplement: NIHMS870866-supplement-Figure_S5.pdf [file NIHMS870866-supplement-Figure_S5.pdf]

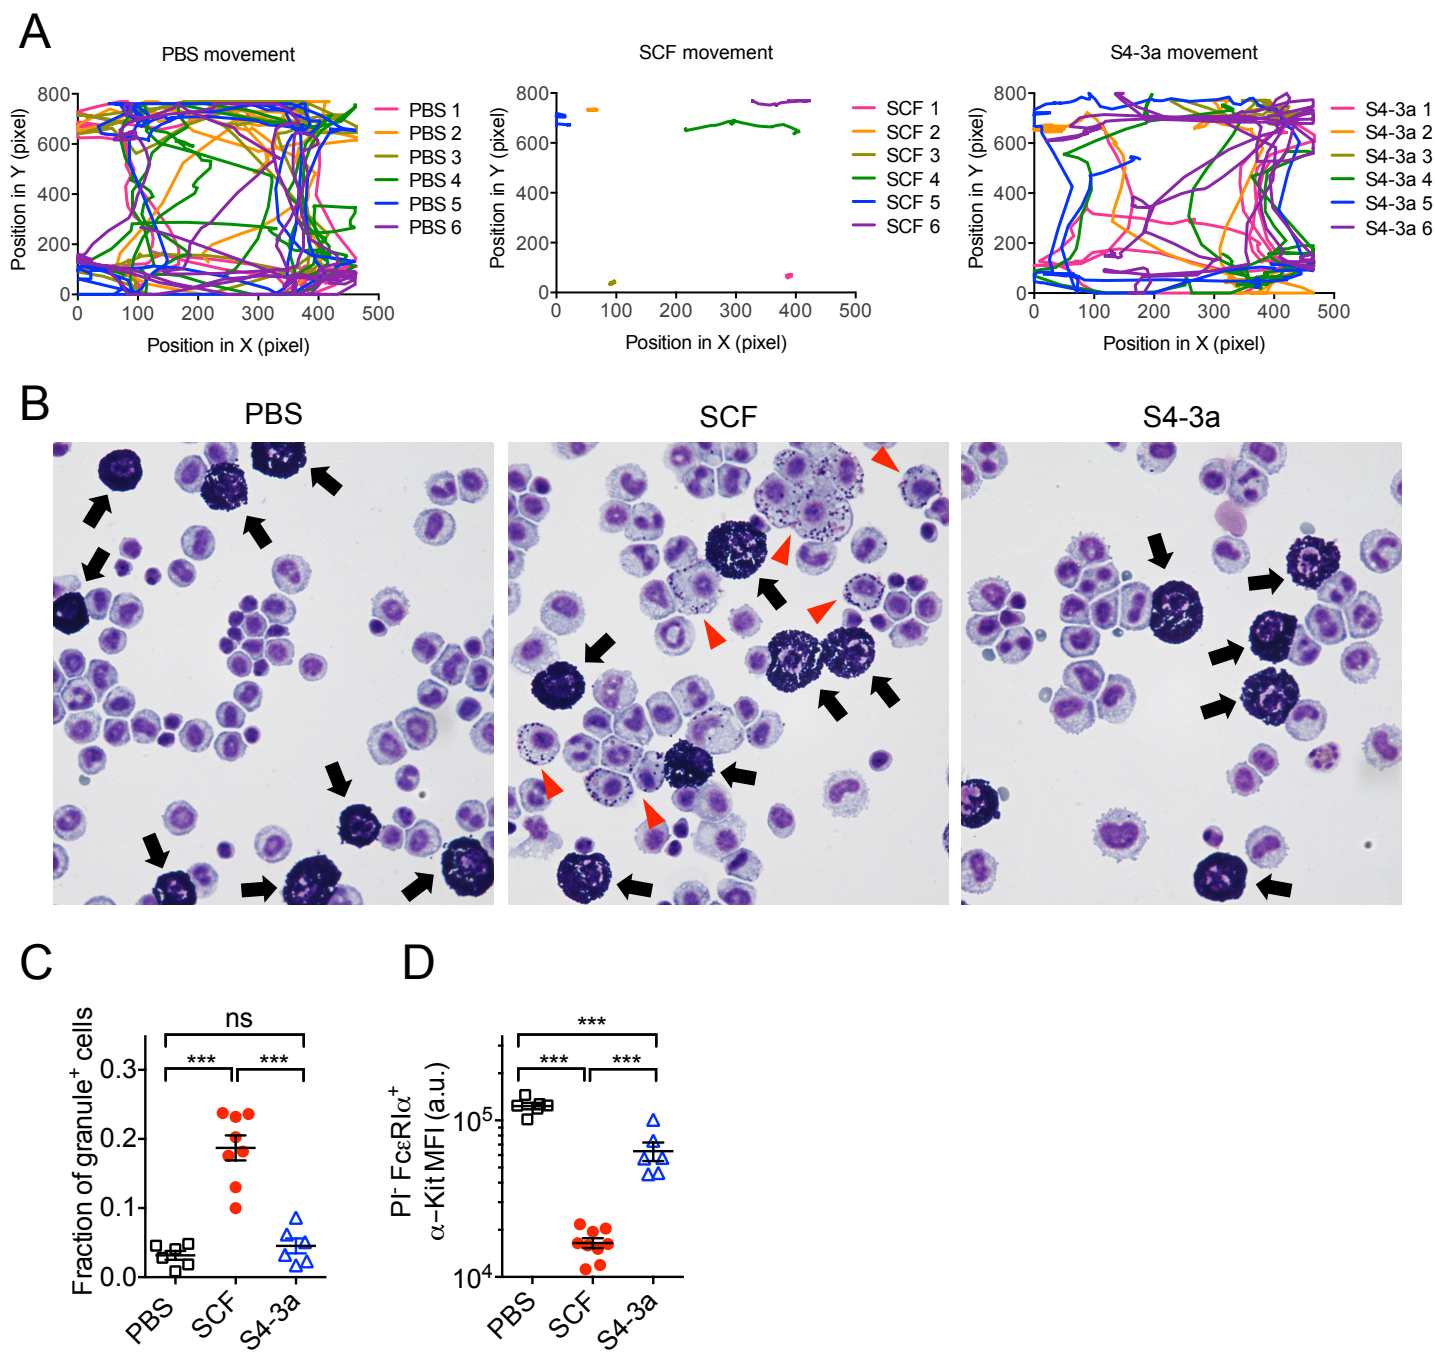

Figure S6

Supplement: NIHMS870866-supplement-Figure_S6.pdf [file NIHMS870866-supplement-Figure_S6.pdf]

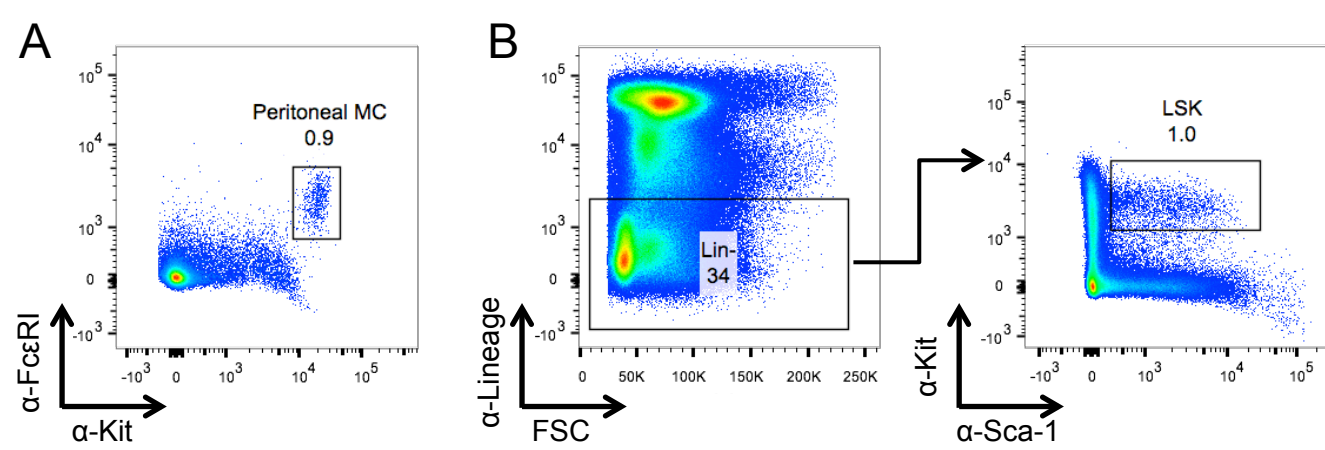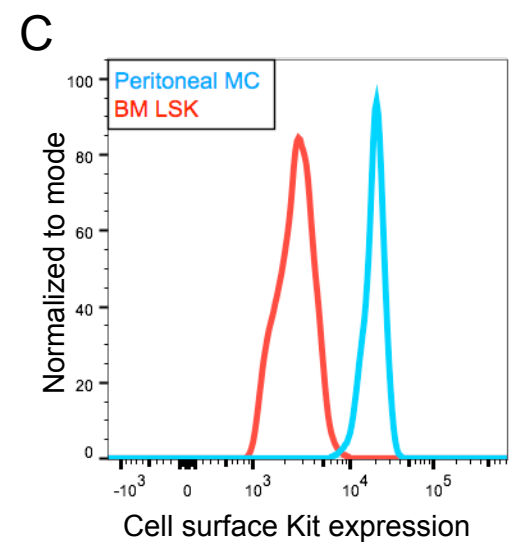

Figure S7

Supplement: NIHMS870866-supplement-Figure_S7.pdf [file NIHMS870866-supplement-Figure_S7.pdf]
